1 Manuscript submission to Diversity and Distributions

2 Article type: Biodiversity Research

3 WEGE: A NEW METRIC FOR RANKING LOCATIONS FOR BIODIVERSITY

4 CONSERVATION

5

6 ***Running title***

7 WEGE index

8

9 ABSTRACT

10 **Aim**

11 In order to implement effective conservation policies, it is crucial to know how biodiversity is  
12 distributed and one of the most widely used systems is the Key Biodiversity Areas (hereafter  
13 KBA) criteria, developed by the International Union for Conservation of Nature (IUCN). Here  
14 we develop a tool to rank Key Biodiversity Areas in a continuous scale to allow the ranking  
15 between KBAs and test this tool on a simulated dataset of 10 000 scenarios of species  
16 compositions of reptiles and mammals in eight locations in Mozambique.

17 **Location**

18 Mozambique, Africa

19 **Methods**

20 We compare the KBA criteria with four prioritisation metrics (weighted endemism, extinction  
21 risk, evolutionary distinctiveness and EDGE score) to rank the biodiversity importance of eight  
22 sites with a randomly generated species composition of reptiles and mammals in Mozambique.

23 **Results**

24 We find that none of these metrics is able to provide a suitable ranking of the sites surveyed  
25 that would ultimately allow prioritization. We therefore develop and validate the “WEGE  
26 index” (Weighted Endemism including Global Endangerment index), which is an adaptation of

27 the EDGE score (Evolutionarily Distinct and Globally Endangered) and allows the ranking of  
28 sites according to the KBA criteria but on a continuous scale.

### 29 **Main conclusions**

30 For our study system, the WEGE index scores areas that trigger KBA status higher and is able  
31 to rank their importance in terms of biodiversity by using the range and threat status of species  
32 present at the site. Prioritization may be crucial for policy making and real-life conservation,  
33 allowing the choice between otherwise equally qualified sites according to the KBA categories.  
34 WEGE is intended to support a transparent decision-making process in conservation.

35

### 36 **Keywords**

37 Africa, EDGE, Key Biodiversity Area, KBAs, Mozambique, policy-making, prioritization.

38

### 39 **INTRODUCTION**

40 In order to protect biodiversity and promote conservation, the decision-making process should  
41 be based more on scientific research and data, and less on expert judgement not supported by  
42 scientific studies (Sutherland et al., 2004). Threats to biodiversity such as conversion and  
43 degradation of natural habitats, and invasion by non-native species and overexploitation, have  
44 the potential of completely decimating biodiversity at local scales (Biofund, 2018; Mucova et  
45 al., 2018). Therefore, in recent years there has been an increased awareness of the value of  
46 protecting particular sites of high biological value, instead of focusing on large extensions of  
47 land (Butchart et al., 2012). Such decisions may ultimately determine whether biodiversity is  
48 preserved or lost. Thus, conservation planning should not only encompass the concepts of  
49 global conservation prioritization (Myers et al., 2000), but also include a more local-scale  
50 approach.

51

52 The Global Standards for the Identification of Key Biodiversity Areas (KBA) is an attempt to  
53 gather a consensus on the distribution of key biodiversity by highlighting sites that contribute

54 significantly to the global persistence of biodiversity (IUCN 2004). The criteria and  
55 methodology for identifying KBAs was created by the IUCN World Commission on  
56 Protected Areas (IUCN, 2016). KBAs can vary considerably in size, and the criteria aim to  
57 address aspects of biodiversity operating from regional to relatively local scales. The  
58 categorization of areas is based on criteria such as presence and proportional inclusion of  
59 threatened species and ecosystems, species' distribution ranges, ecological integrity and  
60 irreplaceability. However, indices that directly measure biodiversity such as species richness  
61 (SR), phylogenetic diversity (PD:Faith, 1992), weighted endemism (WE:Crisp et al., 2001)  
62 and phylogenetic endemism (PE:Rosauer et al., 2009) are not included in the KBA  
63 methodology.

64

65 Although most conservation prioritizations use a richness of already at-risk biodiversity  
66 locations (i.e., at-risk hotspots) in various forms. Few cases have the base information  
67 available on species richness to apply to practical site prioritization. Measures such as PD and  
68 PE introduce the evolutionary relations among species and minimize taxonomic uncertainty.  
69 All these indices contribute to the understanding of how and where biodiversity is distributed  
70 on a continuous scale, and should allow the ranking of individual sites under consideration for  
71 conservation. However, the accuracy of such indices is highly dependent on the quality and  
72 availability of data, making poorly sampled areas particularly hard to evaluate (Faith, 1992;  
73 Faith et al., 2004; Rosauer et al., 2009).

74

75 Although metrics may be useful in various ways in conservation, most of them fail to  
76 incorporate information on the threat status of the constituent species – the IUCN's Red List  
77 Assessment parameter. One exception is the Evolutionarily Distinct and Globally Endangered

78 (EDGE) score (Isaac et al., 2007), which combines one biodiversity index – Evolutionary  
79 Distinctiveness (ED) – with the threat category of species.  
80  
81 ED is a measurement of the branch lengths divided by the number of species within each  
82 clade. The EDGE score combines ED with values for species’ extinction risk in order to  
83 generate a list of species that are both evolutionarily distinct and globally endangered (‘EDGE  
84 species’). The EDGE score is however tailored to rank species rather than locations. Location  
85 scores may be computed as the sum of EDGE scores for all species at a site (Safi et al., 2013).  
86 However, this is not guaranteed to maximize conservation importance of individual sites,  
87 since the presence of widespread, critically endangered species produces higher EDGE scores  
88 than a vulnerable or endangered micro-endemic restricted to very few sites, which could  
89 rapidly go extinct if those sites are damaged. One example is the Atlantic bluefin tuna, which  
90 exists across a great part of the Atlantic Ocean, but nevertheless is considered an endangered  
91 species (Collette et al., 2011).  
92 Without using biodiversity indices, systematic conservation planning is able to spatially  
93 prioritize areas for conservation attributing features to each area and by setting targets. One of  
94 the most common approaches is the use of the concept of irreplaceability (Pressey et al.,  
95 1994), so that irreplaceability scores are calculated for each conservation feature in each  
96 planning unit and range between 0 and 1 (Ferrier et al., 2000). Sites with values closer to 1 are  
97 considered irreplaceable if lost, while values closer to 0 are attributed to sites that in case of  
98 loss, targets may still be met by prioritizing other areas.  
99 In this study we propose an index capable of ranking locations already meeting KBA criteria  
100 and compare its performance with WE, EDGE Score, ED and extinction risk (ER). Since the  
101 KBA methodology weights all species equally, irrespective of their evolutionary uniqueness,  
102 we excluded PD and PE from our analysis. We focus on two distinct vertebrate groups,

103 reptiles and mammals, in which we generated 10 000 possible scenarios and tested the new  
104 index's efficiency at prioritizing locations according to the KBA criteria. Our new spatially  
105 explicit index –WEGE (Weighted Endemism and Globally Endangered) is an adaptation of  
106 the EDGE score (Mooers et al., 2008), where we have replaced the phylogenetic component  
107 with an endemism score and is presented as a tool for attributing a continuous scale for the  
108 Global Standard of Identification of KBAs.

109

## 110 METHODS

### 111 Key Biodiversity Areas

112 Although the Global Standard for the Identification of Key Biodiversity Areas (KBA) (IUCN,  
113 2016) has five main criteria and thresholds for the assessment, namely: A. Threatened  
114 biodiversity; B. Geographically restricted biodiversity; C. Ecological integrity; D. Biological  
115 processes; and E. Irreplaceability through quantitative analysis, only criteria A and B could be  
116 applied to our dataset consisting of a georeferenced species list. The full list of criteria and  
117 applicability in this study is provided in Appendix S1.

118

### 119 *Study area and scenarios*

120 In order to test the new index we propose here, we simulated communities of either reptiles of  
121 mammals in sets of eight location with hypothetical areas corresponding to 0.5 by 0.5 degrees  
122 ( $\sim 2\,500\text{ km}^2$ ) and with species numbers corresponding to the empirically observed from our  
123 field work (6, 7, 8, 8, 9, 9, 10 and 11 species). We simulated 10 000 combinations of species  
124 compositions for each location for both vertebrate groups. We restricted our analysis to  
125 species occurring in Mozambique and generated communities of random species known from  
126 within the country. We retrieved species occurrences from GBIF for all reptiles  
127 (<https://doi.org/10.15468/dl.jwzffj>) and mammals (<https://doi.org/10.15468/dl.6hrjrx>) and

128 produced checklists for reptiles and mammals based on the species that had records in the  
129 country (reptiles - <https://doi.org/10.15468/dl.fpyayo>, mammals -  
130 <https://doi.org/10.15468/dl.2wjwh9> ). We repeated the analysis for KBAs with 0.1 by 0.1 and  
131 1 by 1degrees and the results can be found in the supplementary materials (Appendix S1) as  
132 well as the list of species used to simulate scenarios.

133 To calculate the distribution of species we rounded the GBIF records to 0.1 degrees, thus  
134 creating distribution maps composed of a sum of squares of  $\sim 100 \text{ km}^2$ .

135 To check whether a particular location would trigger KBA status, we restricted our analysis to  
136 three sub-criteria, A1a), A1b) and B1 of the KBA guidelines.

137 The criteria A1a) states that the site regularly holds  $\geq 0.5\%$  of the global population size AND  
138  $\geq 5$  reproductive units of a CR or EN species;

139 The criteria A1b) states that site regularly holds  $\geq 1\%$  of the global population size AND  $\geq 10$   
140 reproductive units of a VU species;

141 The criteria B1) states that Site regularly holds  $\geq 10\%$  of the global population size AND  $\geq 10$   
142 reproductive units of a species;

143 We assumed the presence of  $\geq 10$  reproductive units whenever a species was present in a  
144 location.

145 To which we addressed by using the following conditions:

146 Presence of a CR or EN species with a distribution of  $100\,000 \text{ km}^2$  or less (corresponding to a  
147 presence in one thousand 0.1-degree cells), presence of a VU species with a distribution of  
148  $10\,000 \text{ km}^2$  or less (corresponding to a presence in one hundred 0.1-degree cells) and  
149 presence of any species with a distribution of  $1000 \text{ km}^2$  or less (corresponding to a presence  
150 in 10 0.1-degree cells).

151

152 *Biodiversity indices*

153 To test whether we could use widely used biodiversity metrics to rank our locations, we  
154 calculated the scores of four indices: WE, EDGE score, ER and ED and compared the ranking  
155 of such metrics to our new index, WEGE.

156 Metrics such as EDGE, ER and ED, were calculated by summing the values of the species in  
157 each community randomly generated.

158 To compare the different ranking of the different metrics for each of the 10 000 scenarios we  
159 tested how often the different indices prioritize areas that trigger KBA status.

160 By using eight fictional locations, the number of areas triggering KBA status vary between 0  
161 and 8 and the perfect ranking scores would vary between 1 for scenarios with 1 KBA and 36  
162 for scenarios with 8 KBAs (1+2+3+4+5+6+7+8) (Appendix S1).

163

164 By comparing the distance between the obtained rankings from the different metrics and the  
165 perfect ranking score we are able to compare the performance of the different indices at  
166 ranking KBAs.

167 We compared the by calculating a ranking metric which we defined as  $(\text{Obs}-\text{Min})/(\text{Max}-\text{Min})$ .

168 Obs was the observed sum of the ranking of the sites scored as Kba (i.e. if a simulation had  
169 two KBAs and they are ranked as 2<sup>nd</sup> and 4<sup>th</sup> highest for the particular metric, Obs would be

170  $2+4=6$ ). Max and Min and are the highest and lowest possible rankings for the number of

171 observed KBAs in a given simulation. The ranking score thus varied between 0 (perfect) and 1

172 (worst case scenario irrespective of the number of KBAs).

173

174 The WEGE index

175 We sought a measure that would align its results with the IUCN's KBA categorization of our

176 locations. Since such measure has not yet been proposed to the best of our knowledge, we

177 created an index capable of ranking locations in a continuous scale within the categories of  
178 the KBA.

179

180 The WEGE index proposed here is an adaptation of the EDGE score (Isaac et al., 2007) using  
181 the probability of extinction risk as in Mooers et al. (2008). The idea of the EDGE score is to  
182 measure biodiversity by taking into account both the evolutionary distinctness (ED) and the  
183 Probability of Extinction (ER) as an initial indication of “conservation priority” for species.

184

185 To calculate EDGE, the following formula is used in Mooers et al. (2008):

186

$$\text{EDGE} = \ln(\text{ED} * \text{ER})$$

187

188 The WEGE index uses weighted endemism (WE) instead of evolutionary distinctness (ED)  
189 and just like EDGE, the probability of extinction (ER).

190 To calculate WEGE, we apply the formula:

191

$$\text{WEGE} = (\text{WE} * \text{ER})^2$$

192 To calculate the WEGE index in any given site, we do a sum of the square of the partial  
193 weighted endemism value for each species multiplied by its probability of extinction value. In  
194 order to calculate the values for the WEGE index of all the locations in this study we created a  
195 package in R, available at `devtools::install_github('harithmorgadinho/wege')`.

196 We used the IUCN50 transformation for the ER as in (Davis et al., 2018), which scales the  
197 extinction risk over a 50-year period using the following extinction probabilities: LC =  
198 0.0009, NT = 0.0071, VU = 0.0513, EN = 0.4276, CR = 0.9688.

199 The EDGE enables the ranking of species, rather than directly scoring areas, in regard to  
200 prioritization. The WEGE index, in contrast, allows the ranking of locations rather than  
201 individual taxa.



202

203 In order to give an extinction risk value to “DD” (Data Deficient) species, we assigned them  
204 with the same value as VU species following Bland et al. (2015) who concluded that 64% of  
205 mammals assigned to DD are at risk of extinction.

206

207

## 208 RESULTS

209

210 By generating 10 000 species’ compositions of reptiles and mammals for eight fictional  
211 locations, we created eight different outcomes regarding the number of areas that could  
212 trigger KBA status Fig 1. A and Fig 2. A. For reptiles, due to the high number of range  
213 restricted species in the group, the simulation was able to create the eight possible scenarios,  
214 while mammals due to most species being widespread, there were less KBA trigger species to  
215 trigger KBA status, thus, no scenario with eight areas qualified as KBA was generated.

216 In order to compare the ranking of KBAs between WEGE, WE, ER, ED and EDGE, we  
217 summed all the ranking scores, where the perfect ranking score takes the lowest possible  
218 value. Thus, the lower the sum of the ranking of the metrics, the shortest the distance to the  
219 perfect ranking. In both vertebrate groups, WEGE outperformed the other metrics, followed  
220 by WE, ER, EDGE and ED. In reptiles the difference between WEGE and WE was much  
221 smaller, 494.14 to 566.61 (Fig. 2 B) than in mammals, 89.09 to 435.36 (Fig. 2 B). This  
222 difference in performance is related to the fact that in mammals, unlike reptiles there are more  
223 widespread endangered species. These species have the potential of triggering KBA status and  
224 are weighted by WEGE, unlike WE, which doesn’t take into account the conservation  
225 parameter.

226 In order to test the sparsity of the ranking scores we normalized the data where a score of 0 is  
227 the perfect score while the score of 1 is the worst. Both reptiles and mammals had most of  
228 their WEGE scores closer to 0 when compared to the other metrics (Fig 1. C and Fig 2. C).  
229 For both vertebrate groups tested in this study, reptiles and mammals, and for all KBAs sizes  
230 tested (0.1 by 0.1, 0.5 by 0.5 and 1 by 1 degrees), WEGE consistently outperforms WE, ED,  
231 ER and EDGE both in distance to perfect scores and in number of best rankings achieved. In  
232 addition, WEGE performed 6.4 times better at ranking KBAs than EDGE for reptiles and 40.2  
233 times better for mammals. Thus, our study suggests that in order to rank KBAs in a  
234 continuous scale and using KBA's criteria, WEGE performs substantially better than EDGE.

235

## 236 DISCUSSION

### 237 IUCN's KBA and prioritisation indices

238 The IUCN's KBA uses a set of guidelines to check whether a particular site triggers a KBA  
239 status, unlike biodiversity metrics which attempt to quantify different spectra of biodiversity.  
240 Hence, different biodiversity metrics are expected to weight sites differently. The biodiversity  
241 of specific sites should arguably not be assessed by just summing the number of species  
242 existing in each location, but also taking into account other factors such as genetic diversity,  
243 distribution ranges or conservation status (Magurran, 1988; Barthlott et al., 1999). Otherwise,  
244 the presence of many widespread species producing a high SR would mask the importance of  
245 vulnerable or endangered micro-endemic taxa (restricted to very few sites).

246

247 The fact that SR and PD indices are known to be highly correlated with sampling effort  
248 (Bunge & Fitzpatrick, 1993; A. Rodrigues et al., 2005; A. S. Rodrigues et al., 2011; Tucker &  
249 Cadotte, 2013) advocates against their use in inconsistently and poorly sampled regions,  
250 compared to dense sampling which will in most cases show higher species diversity. In

251 addition, SR and PD completely disregard the information on species range in their score,  
252 which is a strong predictor of extinction risks for species (Purvis et al., 2000) and one of the  
253 fundamental aspects of conservation prioritization and management of natural resources  
254 (Anderson, 1994; Myers et al., 2000; Roberts et al., 2002; Slatyer et al., 2007).  
255  
256 WE and PE are also expected to correlate with sampling effort, since new sets of records can  
257 only consolidate or increase the score but never decrease it (Lande, 1996; Nipperess, 2016),  
258 although this correlation seems to exist at lesser extent than in SR and PD (Soria-Auza &  
259 Kessler, 2008; Oliveira et al., 2016). But besides the sampling effort issue, the use of WE and  
260 PE in ranking areas might encounter additional problems. A benefit of PE is that for two  
261 recently diverged taxa, the vast amount of their evolutionary history is shared and it therefore  
262 matters very little if they are treated as separate species or not. This is critical for groups with  
263 large genera, which often comprise both widespread and range-restricted species as a result of  
264 species radiations. One example is the widely distributed skink of the genus *Cryptoblepharus*,  
265 which if analyzed through WE would score considerably higher compared with an analysis  
266 using PE. *Cryptoblepharus* is very widespread, with some species occurring from the eastern  
267 fringes of the Indo-Australian archipelago, Australia and Oceania, to the islands of the far  
268 Western Indian Ocean and adjacent parts of the African coast (Rocha et al., 2006). The WE  
269 index, in contrast, gives a weight of 1 for every species, which makes the index more  
270 vulnerable to taxonomic changes but guarantees the equal contribution of species within large  
271 genera.  
272 In this study we tested the ranking of KBAs using WE, ER, ED, EDGE and our proposed  
273 index WEGE. Locations that have higher WE are areas in which the species composition  
274 contain species and more restricted ranges. Locations that score higher in ER are areas that  
275 contain more species with higher threat status. Locations with higher ED are areas that house

276 species which have a higher evolutionary distinctiveness. Locations which score higher in  
277 terms of EDGE are areas that have a composition of species with both high evolutionary  
278 distinctiveness and threat levels. Finally, locations with higher WEGE scores, will be  
279 locations with a combinations of range restricted and threatened species.

280 Regarding our analysis, using 10 000 simulated scenarios of species compositions of reptiles  
281 and mammals, the WEGE index outperformed WE, ED, ER and EDGE both at overall sum of  
282 ranking scores and density of scores closer to the perfect score. The results were consistent for  
283 both vertebrate groups and KBA sites sizes tested. The second-best metric was WE, followed  
284 by ER, EDGE and in last place ED. Interestingly, our results show that using ER alone would  
285 be a more efficient way of ranking KBAs when compared to EDGE. Even though, both  
286 EDGE scores and the KBA initiative are focused on the preservation of biodiversity,  
287 according to our study they prioritize different sets of species.

288 The use of EDGE scores to rank sites is only expected to be efficient when the threats are  
289 plausibly mitigated by the protection of a site. Threatened species may be very widespread  
290 under two different scenarios, either they may live in very low population densities like in the  
291 case of tigers or they may be threatened by causes which are not geographic in nature and  
292 where protection of individual areas is of low importance such as in the case of of the  
293 Tasmanian devil. In both cases the species IUCN rank seems highly plausible but no single  
294 site will be as important for the protection of either of the two species as a site containing the  
295 majority of the range of a microendemic would be in the case of the Near threatened Mount  
296 Mabu Pygmy Chameleon.

297

### 298 Suitability of the WEGE Index

299 The new index proposed here (WEGE) is capable of ranking locations in a continuous scale  
300 and matching the KBA status triggered by IUCN's KBA. The WEGE index adds the

301 component of conservation status of each species to the WE index. The internal logic of this  
302 metric is to combine conservation scoring of each species with a measure of the relative  
303 importance of the site in question for each species. This could also be achieved by combining  
304 a conservation score which incorporating evolutionary history such as e.g. PE rather than WE,  
305 but since KBA by design weigh all species equally irrespective of their evolutionary  
306 uniqueness we chose to select a measure with the same lack of taxonomic weighing. By  
307 incorporating WE in the EDGE score formula and creating the WEDGE index, we obtained an  
308 index in line with the IUCN KBAs standards criteria compared to the WE, ED, ER and  
309 EDGE.

310 The WEDGE index can be used either to find suitable candidates' areas to be considered as  
311 KBA's or as a mechanism of weighting the importance of biodiversity of particular KBA's as  
312 well as areas outside KBA's. Additionally, it uses a simpler methodology by employing only  
313 two metrics instead of a set of seven conditions (A1a - e and B1 and B2). Finally, WEDGE can  
314 act as a complement in the process, by which, sites selected using IUCN's KBA can now be  
315 ranked objectively according to their biodiversity importance.

316  
317 Complementing the categorical ranking of locations can bring great advantages when  
318 prioritizing efforts with limited resources. IUCN's criteria lack this aspect by attributing a  
319 binary system where one particular site either triggers KBA status or not. By using WEDGE,  
320 we rank sites within the same category and enabling the decision-making process to be  
321 objective and transparent as possible. Getting conservation actions applied to any given area  
322 usually demands a great deal of effort, so sensitivity to removing sites from KBA status is less  
323 likely to be of high societal priority, but still, this methodology can highlight areas which even  
324 though they trigger KBA status, their score is low and might be on the cusp of losing their  
325 KBA status. KBA sites which are driven either by the presence of one threatened or range

326 restricted species, will change if species become non-threatened or get their range  
327 considerably expanded. Consequently, lower performing WEGE sites have higher odds of  
328 losing their KBA status. One example that illustrates this scenario is the species  
329 *Cryptoblepharus ahli* Mertens, 1928, described by Mertens (1928), synonymized to the  
330 widespread species *Cryptoblepharus africanus* by Brygoo (1986) to later, based on a  
331 morphological examination of the species to be elevated to full species by (Horner & Adams,  
332 2007). This species by itself meets the requirements for the Mozambican Island to trigger  
333 KBA status, regardless of its IUCN status, since it is at the moment an accepted species  
334 confined to a single small island. Further analysis of the genetics of this particular species will  
335 have an impact on the KBA status of this island.

336

337 Limitations and challenges of the WEGE index

338 The two measures, EDGE and WEGE combine two clearly different and unrelated metrics,  
339 whilst WEGE makes use of species distribution and it's IUCN status just as in the IUCN's  
340 KBA. These two criteria are not independent since range size is one of the criteria for IUCN  
341 status. Importantly, however, the two criteria in WEGE clearly still measure distinct processes  
342 which for instance can be seen by the existence of widespread but endangered species like the  
343 already mentioned Bluefin tuna or highly restricted and least concern as the Mount Mabu  
344 Pygmy Chameleon. By combining the two we show that we get a better measure than solely  
345 relying on IUCN criteria or solely on WE.

346

347 Despite ranking locations according to the KBA's guidelines, the WEGE index does not  
348 incorporate all the KBA's criteria because it only uses georeferenced species lists to rank  
349 KBAs. Thus, information such as Ecological Integrity (criteria C), Biological Processes

350 (Criteria D) and Irreplaceability Through Quantitative Analysis (Criteria E) may be subject to  
351 further attempts at complementing the WEGE index.

352 The last step of before proposing a particular site as a KBA requires an analysis of the  
353 manageability of the site in regards to its physical attributes such as forest cover limits or  
354 rivers and anthropogenic factors such as roads and existence of human settlements. The  
355 WEGE index in itself is not aimed at replacing this process, we believe this step to be of  
356 crucial importance and should be done case by case and involving local authorities. The aim  
357 of the WEGE index is to highlight and rank sites which should in the following step be  
358 scrutinized at a local level as in the KBA process or rank already existing KBAs.

359

360 Final remarks

361

362 The idea of prioritisation between KBAs foreseeing conservation policy has already been  
363 proposed (Pressey et al., 1994; Ferrier et al., 2000; Plumptre et al., 2019; Smith et al., 2019).  
364 Protection status, funding, irreplaceability by prioritization software (Plumptre et al., 2019)  
365 and systematic conservation planning (Smith et al., 2019) have been proposed to support the  
366 ranking of priority of areas. The results, although providing some kind of hierarchy between  
367 KBAs, still cluster KBAs in different categories, rather than scoring individual sites as  
368 allowed in WEGE. In systematic conservation planning, conservation practitioners must  
369 choose which conservation features should be used to represent biodiversity (Smith et al.,  
370 2019). WEGE represents a simple metric that encapsulates the biodiversity importance of a  
371 particular site, highlighting the same areas as the KBAs criteria while adding the component  
372 of continuous scale. Therefore, WEGE may also be used as a feature in systematic  
373 conservation planning.

374

375 The prioritization of areas in regard to biodiversity is complex. Different indices prioritize  
376 different areas. IUCN KBAs do not contemplate biodiversity indices in the decision-making  
377 process. However, for the case of reptiles and mammals in Mozambique, we found a  
378 correlation between the areas that would in theory trigger Key Biodiversity Area status and  
379 the WEGE Index.

380

381 Mozambique is a developing country that struggles to conciliate its rich biodiversity with the  
382 for the mining industry, and the high potential economic gain that could follow. The country  
383 also has one of the highest corruption levels in the world, and unbiased methods to quantify  
384 biodiversity are a crucial parameter for a transparent decision-making process in conservation.  
385 The selection of sites as KBAs is expected to have multiple uses, including conservation  
386 planning support and priority-setting at national and regional levels (IUCN, 2016). Therefore,  
387 the use of the WEGE index, allowing the ranking of key biodiversity areas is expected to by  
388 association support a transparent ranking of sites in regards to conservation.

389

390 Supporting Information

391 Methods used for calculating indices, r packages used, KBA guidelines and raw data  
392 (Appendix S1), is available online.

393



3943. References

- 395 Anderson, S. (1994). Area and endemism. *The quarterly review of biology*, 69(4), 451-471.
- 396 Barthlott, W., Biedinger, N., Braun, G., Feig, F., Kier, G., & Mutke, J. (1999). Terminological  
397 and methodological aspects of the mapping and analysis of global biodiversity (Vol.  
398 162).
- 399 Biofund. (2018). Retrieved from <http://www.biofund.org.mz/>
- 400 Bland, L. M., Collen, B., Orme, C. D. L., & Bielby, J. (2015). Predicting the conservation  
401 status of data-deficient species. *Conservation Biology*, 29(1), 250-259. Retrieved from  
402 <https://conbio.onlinelibrary.wiley.com/doi/abs/10.1111/cobi.12372>.  
403 doi:10.1111/cobi.12372
- 404 Brygoo, E. (1986). Systématique des Lézards Scincidés de la région malgache. XVIII: Les  
405 Cryptoblepharus. *Bulletin du Muséum national d'histoire naturelle. Section A,*  
406 *Zoologie, biologie et écologie animales*, 8(3), 643-690.
- 407 Bunge, J., & Fitzpatrick, M. (1993). Estimating the number of species: a review. *Journal of*  
408 *the American Statistical Association*, 88(421), 364-373.
- 409 Butchart, S. H., et al. (2012). Protecting important sites for biodiversity contributes to meeting  
410 global conservation targets. *PloS one*, 7(3), e32529.
- 411 Collette, B., et al. (2011). *Thunnus thynnus*. In IUCN 2012. IUCN Red List of Threatened  
412 Species.
- 413 Crisp, M. D., Laffan, S., Linder, H. P., & Monro, A. (2001). Endemism in the Australian  
414 flora. *Journal of Biogeography*, 28(2), 183-198.
- 415 Davis, M., Faurby, S., & Svenning, J.-C. (2018). Mammal diversity will take millions of years  
416 to recover from the current biodiversity crisis. *Proceedings of the National Academy*  
417 *of Sciences*, 115(44), 11262-11267. Retrieved from  
418 <https://www.pnas.org/content/pnas/115/44/11262.full.pdf>.  
419 doi:10.1073/pnas.1804906115
- 420 Faith, D. P. (1992). Conservation evaluation and phylogenetic diversity. *Biological*  
421 *Conservation*, 61(1), 1-10.
- 422 Faith, D. P., Reid, C., & Hunter, J. (2004). Integrating phylogenetic diversity,  
423 complementarity, and endemism for conservation assessment. *Conservation Biology*,  
424 18(1), 255-261.
- 425 Ferrier, S., Pressey, R. L., & Barrett, T. W. (2000). A new predictor of the irreplaceability of  
426 areas for achieving a conservation goal, its application to real-world planning, and a  
427 research agenda for further refinement. *Biological Conservation*, 93(3), 303-325.
- 428 Horner, P., & Adams, M. (2007). A molecular-systematic assessment of species boundaries in  
429 Australian *Cryptoblepharus* (Reptilia: Squamata: Scincidae): a case study for the  
430 combined use of allozymes and morphology to explore cryptic biodiversity: Museums  
431 and Art Galleries of the Northern Territory.
- 432 Isaac, N. J., Turvey, S. T., Collen, B., Waterman, C., & Baillie, J. E. (2007). Mammals on the  
433 EDGE: conservation priorities based on threat and phylogeny. *PloS one*, 2(3), e296.
- 434 IUCN. (2016). A Global Standard for the Identification of Key Biodiversity Areas. Retrieved  
435 from Gland, Switzerland:
- 436 Lande, R. (1996). Statistics and partitioning of species diversity, and similarity among  
437 multiple communities. *Oikos*, 5-13.
- 438 Magurran, A. E. (1988). Why diversity? In *Ecological diversity and its measurement* (pp. 1-  
439 5): Springer.
- 440 Mertens, R. (1928). Neue inselrassen von *Cryptoblepharus boutonii* (Desjardin). *Zoologischer*  
441 *Anzeiger*, 78, 82-89.

- 442 Mooers, A. Ø., Faith, D. P., & Maddison, W. P. (2008). Converting endangered species  
443 categories to probabilities of extinction for phylogenetic conservation prioritization.  
444 *PloS one*, 3(11), e3700.
- 445 Mucova, S. A. R., Leal Filho, W., Azeiteiro, U. M., & Pereira, M. J. (2018). Assessment of  
446 land use and land cover changes from 1979 to 2017 and biodiversity & land  
447 management approach in Quirimbas National Park, Northern Mozambique, Africa.  
448 *Global Ecology Conservation*, 16, e00447.
- 449 Myers, N., Mittermeier, R. A., Mittermeier, C. G., Da Fonseca, G. A., & Kent, J. (2000).  
450 Biodiversity hotspots for conservation priorities. *Nature*, 403(6772), 853.
- 451 Nipperess, D. A. (2016). The rarefaction of phylogenetic diversity: formulation, extension and  
452 application. *Biodiversity Conservation and Phylogenetic Systematics*, 14, 197-217.
- 453 Oliveira, U., et al. (2016). The strong influence of collection bias on biodiversity knowledge  
454 shortfalls of Brazilian terrestrial biodiversity. *Diversity and distributions*, 22(12),  
455 1232-1244.
- 456 Plumptre, A. J., et al. (2019). Conservation of vertebrates and plants in Uganda: Identifying  
457 Key Biodiversity Areas and other sites of national importance. *Conservation Science  
458 and Practice*, 1(2), e7.
- 459 Pressey, R., Johnson, I., & Wilson, P. (1994). Shades of irreplaceability: towards a measure of  
460 the contribution of sites to a reservation goal. *Biodiversity & Conservation*, 3(3), 242-  
461 262.
- 462 Purvis, A., Gittleman, J. L., Cowlshaw, G., & Mace, G. M. (2000). Predicting extinction risk  
463 in declining species. *Proceedings of the Royal Society of London. Series B: Biological  
464 Sciences*, 267(1456), 1947-1952.
- 465 Roberts, C. M., et al. (2002). Marine biodiversity hotspots and conservation priorities for  
466 tropical reefs. *Science*, 295(5558), 1280-1284.
- 467 Rocha, S., Carretero, M. A., Vences, M., Glaw, F., & James Harris, D. (2006). Deciphering  
468 patterns of transoceanic dispersal: the evolutionary origin and biogeography of coastal  
469 lizards (*Cryptoblepharus*) in the Western Indian Ocean region. *Journal of  
470 Biogeography*, 33(1), 13-22.
- 471 Rodrigues, A., Brooks, T. M., & Gaston, K. J. (2005). Integrating phylogenetic diversity in  
472 the selection of priority areas for conservation: does it make a difference. *Phylogeny  
473 Conservation*, 8, 101-119.
- 474 Rodrigues, A. S., et al. (2011). Complete, accurate, mammalian phylogenies aid conservation  
475 planning, but not much. *Philosophical Transactions of the Royal Society of London B:  
476 Biological Sciences*, 366(1578), 2652-2660.
- 477 Rosauer, D., Laffan, S. W., Crisp, M. D., Donnellan, S. C., & Cook, L. G. (2009).  
478 Phylogenetic endemism: a new approach for identifying geographical concentrations  
479 of evolutionary history. *Molecular ecology*, 18(19), 4061-4072.
- 480 Safi, K., Armour-Marshall, K., Baillie, J. E., & Isaac, N. J. (2013). Global patterns of  
481 evolutionary distinct and globally endangered amphibians and mammals. *PloS one*,  
482 8(5), e63582.
- 483 Slatyer, C., Rosauer, D., & Lemckert, F. (2007). An assessment of endemism and species  
484 richness patterns in the Australian Anura. *Journal of Biogeography*, 34(4), 583-596.
- 485 Smith, R. J., et al. (2019). Synergies between the key biodiversity area and systematic  
486 conservation planning approaches. *Conservation Letters*, 12(1), e12625.
- 487 Soria-Auza, R. W., & Kessler, M. (2008). The influence of sampling intensity on the  
488 perception of the spatial distribution of tropical diversity and endemism: a case study  
489 of ferns from Bolivia. *Diversity and distributions*, 14(1), 123-130.
- 490 Sutherland, W. J., Pullin, A. S., Dolman, P. M., & Knight, T. M. (2004). The need for  
491 evidence-based conservation. *Trends in ecology evolution*, 19(6), 305-308.

492 Tucker, C., & Cadotte, M. (2013). Unifying measures of biodiversity: Understanding when  
493 richness and phylogenetic diversity should be congruent (Vol. 19).  
494

495 **DATA AVAILABILITY STATEMENT**

496 Data may be available from the authors upon request.

497

498

499

500

501

Figure-Legend Page

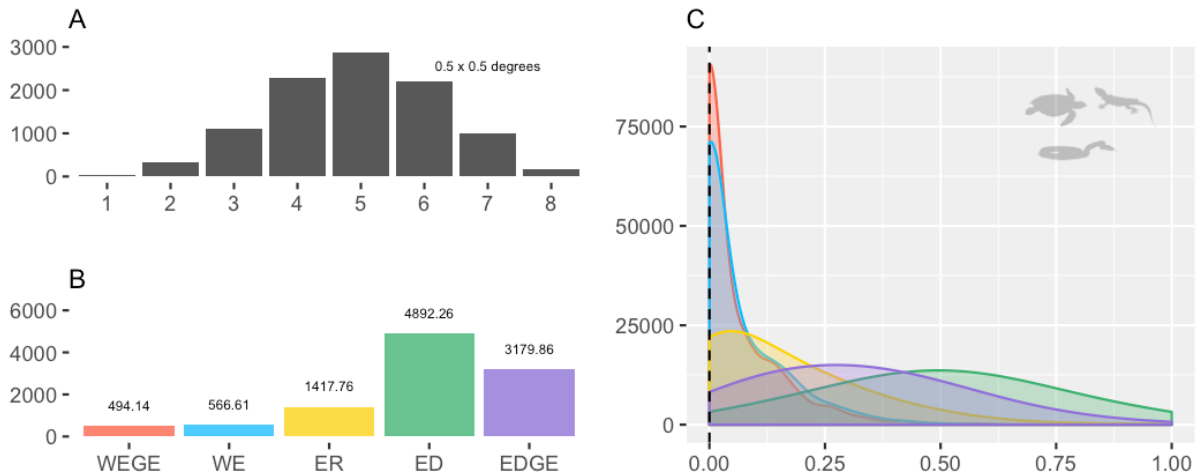

502

*Figure 1:* Number of areas triggering KBA status obtained by simulating 10 000 scenarios in reptile species' composition. B. Indices combined sum for all scenarios. C. Frequency of scores normalized between different number of KBAs. The figure shows that WEGE outperforms the other indices by both getting a smaller overall sum (B) and by having a higher density of values closer to 0 (C).

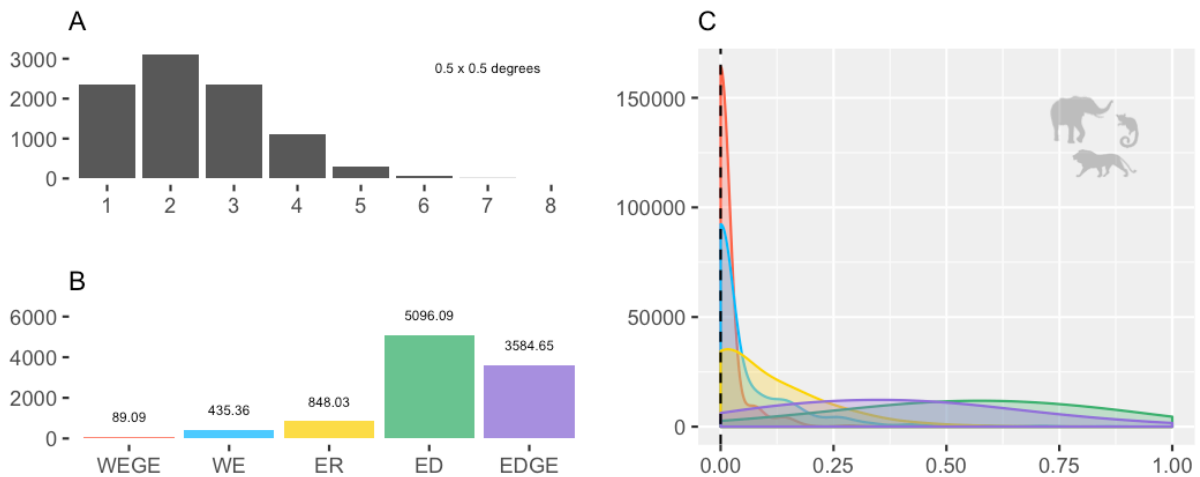

503

*Figure 2:* Number of areas triggering KBA status obtained by simulating 10 000 scenarios in mammal species' composition. B. Indices combined sum for all scenarios. C. Frequency of scores normalized between different number of KBAs. The figure shows that WEGE outperforms the other indices by both getting a smaller overall sum (B) and by having a higher density of values closer to 0 (C).

504
